# Supplementary material for: Sustained reduction of catheter-associated bloodstream infections with enhancement of catheter bundle by chlorhexidine dressings over 11 years
Source: Springer Nature journal article supplement (doi:10.1007/s00134-019-05617-x), 2019-04-17
Supplement: MOESM1 [file 16662486]

## **Sustained reduction of catheter associated bloodstream infections with enhancement of catheter bundle by chlorhexidine dressings over eleven years**

Philippe Eggimann<sup>1</sup> MD, Jean-Luc Pagani<sup>1</sup> MD, Elise Dupuis-Lozeron<sup>2</sup> MD, Bruce Ekholm PhD<sup>3</sup>, Marie-Josèphe Thévenin<sup>4</sup> RN, Christine Joseph<sup>1</sup> RN, Jean-Pierre Revelly<sup>1</sup> MD, Yok-Ai Que<sup>5</sup> MD

1: Service of Intensive Care Medicine, University Hospital of Lausanne and University of Lausanne, Lausanne, Switzerland.

2: Unit of Population Epidemiology, Department of Community Medicine, Primary Care and Emergency Medicine, Geneva University Hospitals, Geneva, Switzerland.

3: 3M Health Care Business, 3M Center, St. Paul, MN, USA

4: Service of Hospital Preventive Medicine, University Hospital of Lausanne and University of Lausanne, Lausanne, Switzerland.

5: Department of Intensive Care Medicine, Inselspital, Bern University Hospital, University of Bern, Bern, Switzerland

Key words: Catheter-related infections – Central-Line-Associated Bloodstream infections – Catheter bundle — Nosocomial infection – Bacteremia – Prevention – Chlorhexidine-dressing – Chlorhexidine sponge – Chlorhexidine gel

Corresponding author: Philippe Eggimann MD

Department of the Locomotor Apparatus

Centre Hospitalier Universitaire Vaudois (CHUV)

Rue du Bugnon 46, BH 14-309

CH 1211 Lausanne, Switzerland

Phone: +41 79 556 7426

Email: [Philippe.eggimann@chuv.ch](mailto:Philippe.eggimann@chuv.ch)

**Online supplement Table 1: Intervention (Study periods)**

| Study Period    | Time Period                       | Dressing Regimen                                                                                                                                                                                                                                                                                                                                                                                                                                                                                                                                                                                                                                                                                                                                                                                                                                                                                                                                                                   |
|-----------------|-----------------------------------|------------------------------------------------------------------------------------------------------------------------------------------------------------------------------------------------------------------------------------------------------------------------------------------------------------------------------------------------------------------------------------------------------------------------------------------------------------------------------------------------------------------------------------------------------------------------------------------------------------------------------------------------------------------------------------------------------------------------------------------------------------------------------------------------------------------------------------------------------------------------------------------------------------------------------------------------------------------------------------|
| A<br>(baseline) | January 2006<br>to October 2007   | <p>Basic catheter bundle (for details see Supplemental Table 2).</p> <p>In summary:</p> <p>(1) General infection control measures (Hand Hygiene, standard and isolation precaution) and surveillance;</p> <p>(2) Guidelines for catheter insertion (checklist for material preparation, standardized hair cut with clipper and CHG bases skin disinfection, maximal sterile barrier precaution);</p> <p>(3) Handling: avoidance of needle and needless connectors, systematic CHG disinfection of stop-cock with new cups at each opening of the hub);</p> <p>(4) Maintenance: Daily check for catheter necessity, signs of catheters infections and dressing integrity and need for replacement;</p> <p>(5) Surveillance and Feedback: to guarantee uniform application of the bundle, a designated physician and a designated nurse led the whole bundle and gave periodic feedback based on surveillance data. Sterile gauze, covered by Mefix® Dressing (No CHG-dressings)</p> |
| B               | November 2007 to<br>November 2009 | CHG-sponge on jugular and femoral CVC (all units)                                                                                                                                                                                                                                                                                                                                                                                                                                                                                                                                                                                                                                                                                                                                                                                                                                                                                                                                  |
| C               | December 2009<br>to May 2011      | CHG-sponge on all CVC and arterial catheters (all units)                                                                                                                                                                                                                                                                                                                                                                                                                                                                                                                                                                                                                                                                                                                                                                                                                                                                                                                           |
| D               | June 2011<br>to May 2013          | <p>CHG-sponge in 3 units (18 beds) and</p> <p>CHG-gel on 2 units (14 beds)</p> <p>on all CVC and arterial catheters</p>                                                                                                                                                                                                                                                                                                                                                                                                                                                                                                                                                                                                                                                                                                                                                                                                                                                            |
| E               | June 2013<br>to December 2014     | <p>CHG-gel in all units</p> <p>on all CVC and arterial catheters</p>                                                                                                                                                                                                                                                                                                                                                                                                                                                                                                                                                                                                                                                                                                                                                                                                                                                                                                               |

**Online supplement Table 2: Catheter bundle** <sup>1,2,3</sup>

|                                                  | <b>Specific components</b>                                                                                                                                                                                                                                                                                                                                                                                                                                                                                                                                                                                                                                                                                                                                                                                                       |
|--------------------------------------------------|----------------------------------------------------------------------------------------------------------------------------------------------------------------------------------------------------------------------------------------------------------------------------------------------------------------------------------------------------------------------------------------------------------------------------------------------------------------------------------------------------------------------------------------------------------------------------------------------------------------------------------------------------------------------------------------------------------------------------------------------------------------------------------------------------------------------------------|
| <b>General infection control measures</b>        |                                                                                                                                                                                                                                                                                                                                                                                                                                                                                                                                                                                                                                                                                                                                                                                                                                  |
| Hand hygiene, standard and isolation precautions | <ul style="list-style-type: none"> <li>- Systematic hand hygiene with an alcoholic hand-rub solution</li> <li>- Hands washing with soap and water for soiled hands systematically followed by hand disinfection with an alcoholic hand-rub solution</li> <li>- Standard precautions including detailed guidelines for the use of hospital clothes, gloves, gowns, protective glasses</li> <li>- Additional isolation precaution: contact, droplet, airborne when indicated</li> </ul>                                                                                                                                                                                                                                                                                                                                            |
| Surveillance of infections                       | <ul style="list-style-type: none"> <li>- Quarterly review of all positive blood cultures. First, each episode was attributed to the following settings: (1) community-acquired (&lt;48h of hospital admission); (2) hospital non-ICU acquired (&lt;48h of ICU admission) and (3) ICU-acquired. Second, ICU-acquired positive blood cultures were further adjudicated to 4 categories: (1) catheter-related bloodstream infection; (2) primary bacteremia; (3) secondary bacteremia, and (4) contamination adjudication to the following categories of stream infections according to standard definitions (Supplemental Figure 1) by one or two ICU attending physician and 1 dedicated infection control nurses.</li> <li>- Bi-annual feedback to the all the staff of the ICU (nurses-assistant, nurses, physician)</li> </ul> |
| <b>Guidelines for catheter insertion</b>         |                                                                                                                                                                                                                                                                                                                                                                                                                                                                                                                                                                                                                                                                                                                                                                                                                                  |
| Checklist for material preparation               | By the assistant of the operator to avoid interruptions during the insertion                                                                                                                                                                                                                                                                                                                                                                                                                                                                                                                                                                                                                                                                                                                                                     |
| Recommendation for placing patient and devices   | Positioning of the patient and preparation of the material required for insertion, including US machine by the operator and the                                                                                                                                                                                                                                                                                                                                                                                                                                                                                                                                                                                                                                                                                                  |

|                                                         |                                                                                                                                                                                                                                                                       |
|---------------------------------------------------------|-----------------------------------------------------------------------------------------------------------------------------------------------------------------------------------------------------------------------------------------------------------------------|
|                                                         | assistant according to the site chosen for the insertion which is left to the choice of the physician in charge                                                                                                                                                       |
| Skin preparation                                        | Hair removal: with a disposable clipper, shaving forbidden<br>Two-level kit insertion 1 of 2:<br>Skin disinfection with a colored solution (Chlorhexidine 2% with alcohol 70%, systematic since 2011) by the operator using a cap, a surgical mask and sterile gloves |
| Maximal sterile barrier precaution                      | Two-level insertion kit 1 of 2:<br>Operator remove gloves, hand hygiene and cloth with a sterile gown and new sterile gloves.<br>Large sterile draping surrounding the insertion area                                                                                 |
| Recommendation for catheter insertion under US guidance | Specific training of all operators for the insertion under US guidance (systematic since 2012)                                                                                                                                                                        |
| Recommendation for catheter fixation                    | Suture of the catheter at its emergence at the insertion site. Sutures to be covered by the CHG-sponge or CHG-gel dressings (See Supplemental Figure 4)                                                                                                               |
| Recommendation for catheter dressing                    | Progressive introduction of chlorhexidine dressings according to the timing specified in Table 1.<br>Theoretical education and bedside training was provided to all HCW working in the ICU over all the study period.                                                 |
| Recommendation for documentation                        | Time and date of insertion (site and type of catheter) and dressing prospectively recorded in the computerized information system as a continuous process.                                                                                                            |
| <b>Guidelines for catheter handling and maintenance</b> |                                                                                                                                                                                                                                                                       |
| Checklist for maintenance                               | Specific catheter maintenance checklist during the daily medical and nursing rounds: catheter needed, standardization for administration set change, dressing change                                                                                                  |

|                                                   |                                                                                                                                                                                                                                                                                                                                                    |
|---------------------------------------------------|----------------------------------------------------------------------------------------------------------------------------------------------------------------------------------------------------------------------------------------------------------------------------------------------------------------------------------------------------|
| Catheter handling                                 | <p>Opening of the hub: on antiseptic-impregnated pads (chlorhexidine 2% and alcohol 70%) after hand disinfection.</p> <p>New caps without disinfection coating at each opening</p> <p>Lines changed every 96h, every 24h for lipids and blood products</p>                                                                                         |
| Dressing change                                   | <p>Systematic new CHG-dressing of all CVC and arterial catheter upon ICU admission with catheter already inserted.</p> <p>In the absence of indication for change (unstuck, leaking, bloody, humidity saturated), chlorhexidine dressings are used up to 7 consecutive days</p>                                                                    |
| Check for catheter infection                      | <p>During the daily medical and nursing round:</p> <p>Blood cultures performed in case of clinical sign of infection (sepsis)</p> <p>Inspection and palpation of all catheter insertion site</p>                                                                                                                                                   |
| Recommendation for catheter change or replacement | <p>Guidewire exchange of CVC and arterial lines with culture for any clinical suspicion of infection in the absence of other clinical sign of infection</p> <p>Catheter removal and culture if clinical suspicion of an infection at the insertion site</p> <p>Peripheral catheter systematically changes at ICU admission and every 48 to 72h</p> |

1. All measures and detailed comments available as print document and on the website of the ICU with all other type of recommendations and policies used in the ICU.
2. Systematic training of all newly introduced HCW (physician, nurses and assistant nurses of any qualification and experience)
3. Dedicated clinical nurses in charge of instruction of HCW and regular bedside teaching to ensure the maintenance of all techniques of care detailed above
4. All measures are listed and detailed in the procedure of nursing and medical care (illustrated technical sheets available in dedicated binders and in the intranet of the ICU, part of the procedures certified by an ISO 9001 accreditation).

**Online supplement Table 3: Blood cultures performed over the study and post study periods**

| <b>Year</b>                  | <b>2006</b> | <b>2007</b> | <b>2008</b> | <b>2009</b> | <b>2010</b> | <b>2011</b> | <b>2012</b> | <b>2013</b> | <b>2014</b> | <b>2015</b> | <b>2016</b> | <b>2017</b> | <b>2018</b> |
|------------------------------|-------------|-------------|-------------|-------------|-------------|-------------|-------------|-------------|-------------|-------------|-------------|-------------|-------------|
| <b>Contaminated BC</b>       | 66          | 83          | 70          | 90          | 90          | 51          | 62          | 60          | 52          | 50          | 74          | 54          | 47          |
| <b>Contaminated BC/100BC</b> | 1.2         | 1.2         | 1           | 1.4         | 1.5         | 0.85        | 1.06        | 0.8         | 0.7         | 0.6         | 0.76        | 0.65        | 0.64        |
| <b>BC total</b>              | 5500        | 6917        | 7000        | 6429        | 6000        | 6000        | 5849        | 7500        | 7429        | 8333        | 9737        | 8308        | 7321        |
| <b>BC/100 pat-days</b>       | 58.4        | 68.8        | 76.2        | 66.0        | 62.1        | 56.9        | 54.8        | 66.9        | 65.5        | 70.3        | 83.1        | 72.5        | 71.4        |

**Online supplement Figure 1:** Catheter use, episodes and incidence density rate of CABSBI by period

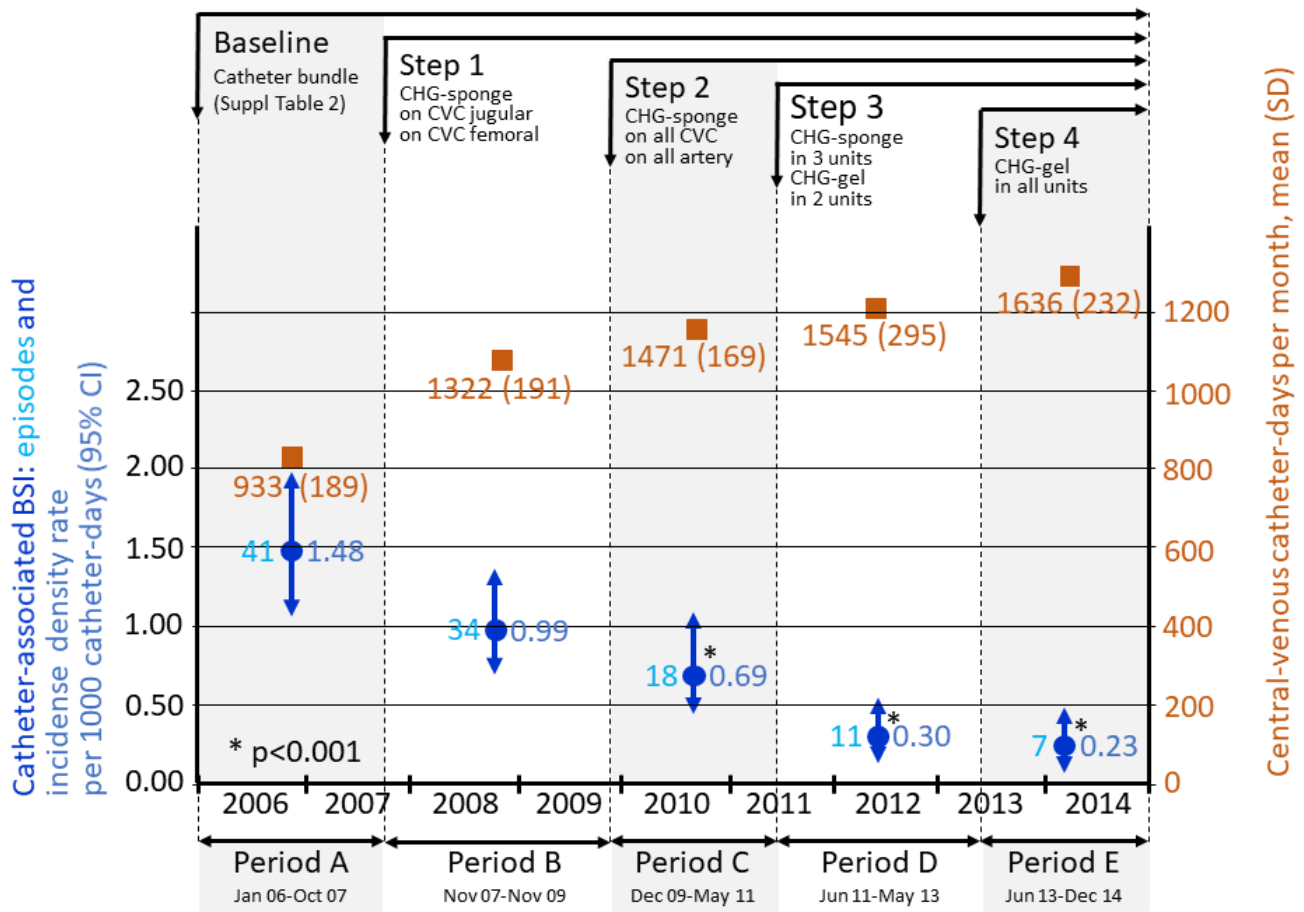

Legend to Online supplement Figure 1: p values from comparison to period A were 0.085 for period B, 0.0007 for period C, < 0.001 for period D and E. BSI denotes bloodstream infection, i.e CRBSI + primary bacteremia.

Among 70 CRBSI, the type and site of insertion of the catheter were: CVC jugular: 47 (65.7%), CVC subclavian 13 (18.6%), CVC femoral 10 (14.3%) and arterial radial 1 (1.4%)

**Online supplement Figure 2:** Incidence density rates (with 95% CI) by Period for each type of infection; p values are from the comparison to Period A. **a)** CRBSI (Catheter Related Blood Stream Infection), **b)** Primary bacteremia

**Online supplement Figure 2a**

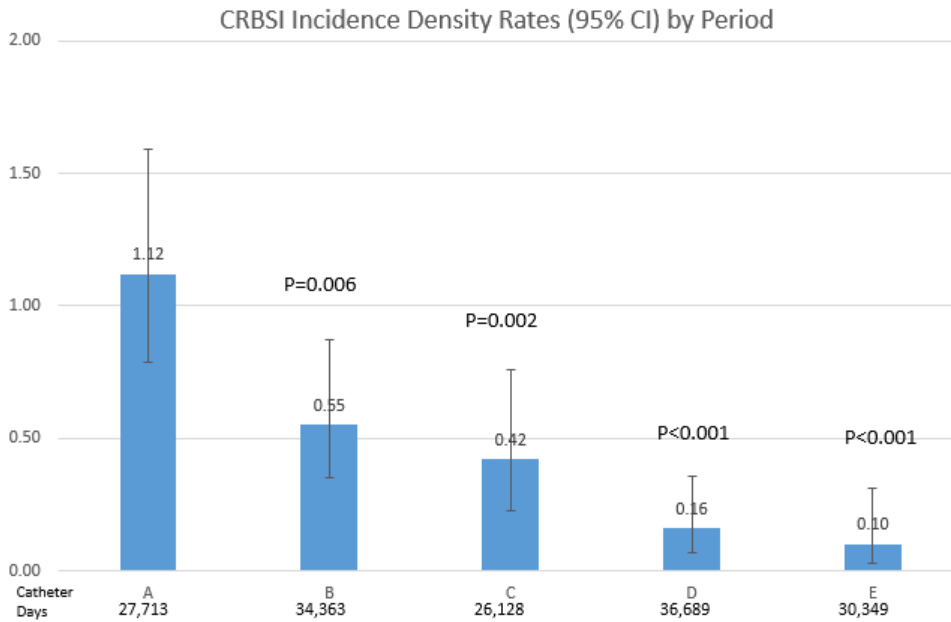

**Online supplement Figure 2b**

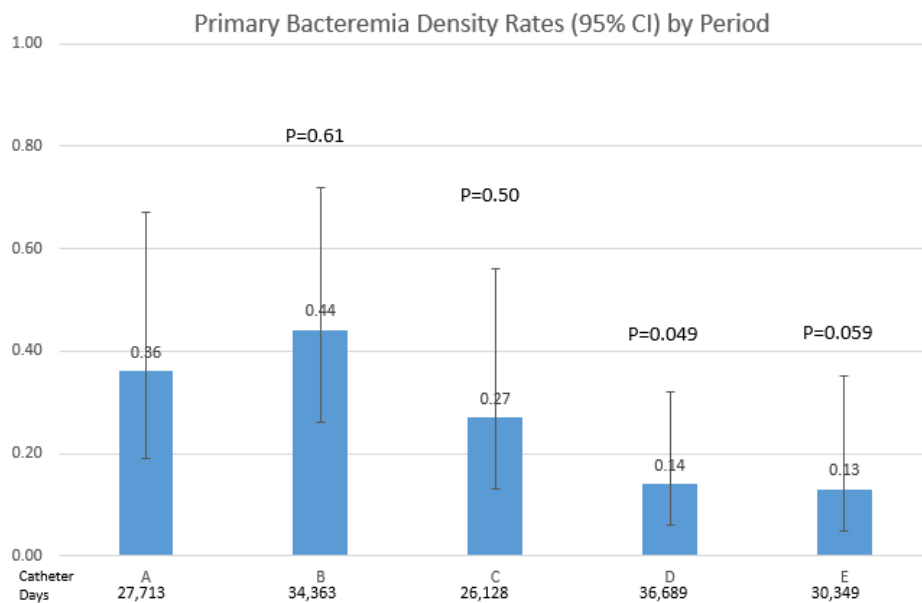



**Supplemental Figure 3: Examples of skin reactions observed with CHG-gel dressing**

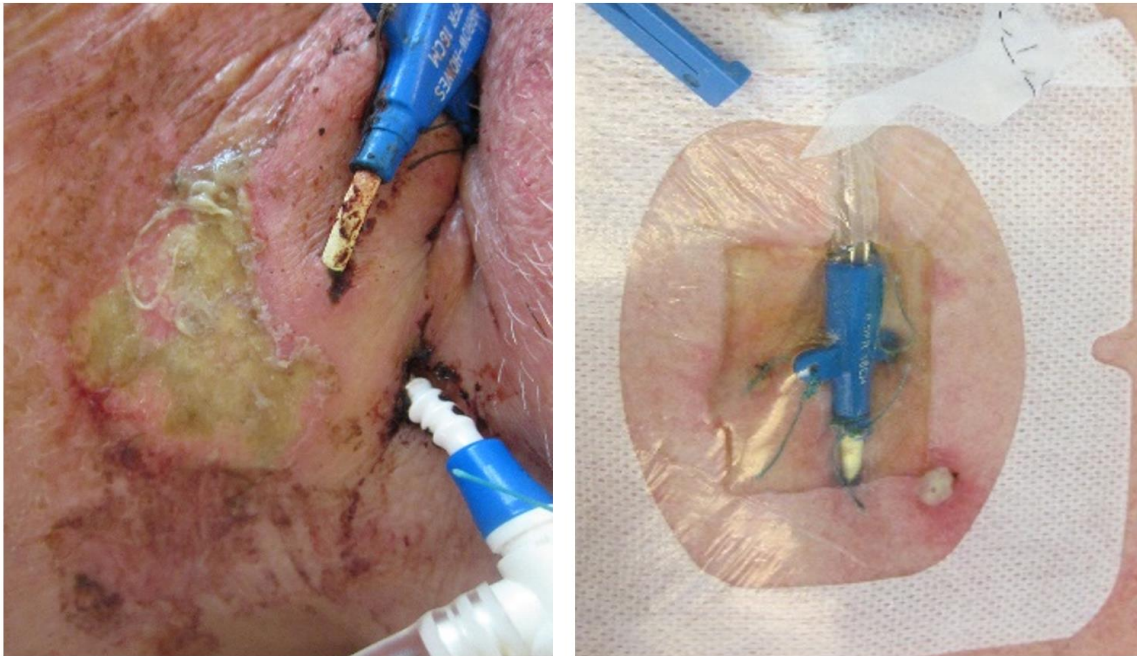

**Supplemental Figure 4: CHG-gel dressing covering insertion and suture sites**

a) on central venous catheter

b) on arterial catheter.

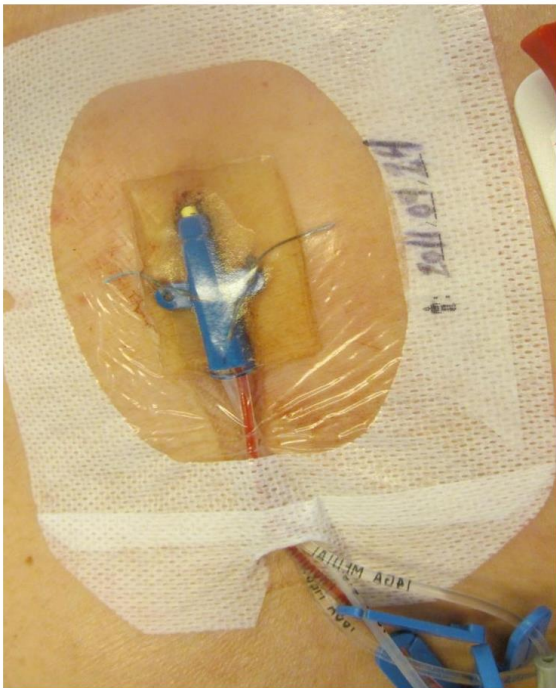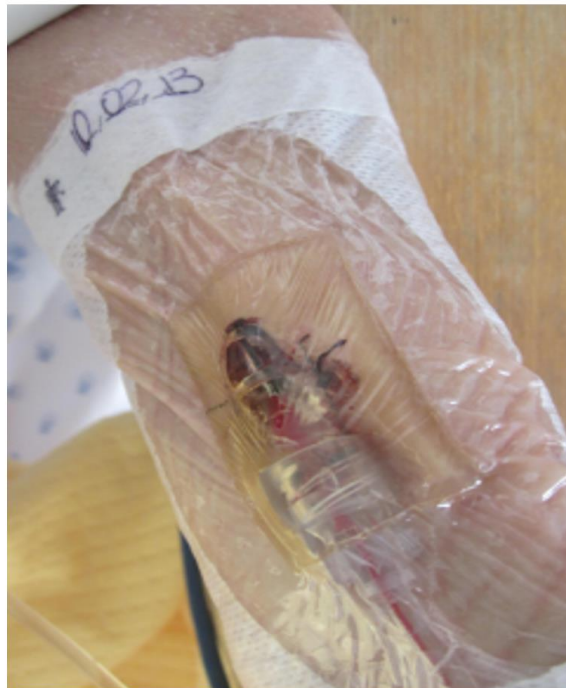

**Legend to Suppl Fig 4: CHG-gel which covers the insertion site and the sutures of the catheters**
